# Supplementary material
Source: Springer Nature journal article supplement (https://www.springermedizin.de/resource/supplementary/13569_2014_68_MOESM11_ESM.pdf/9676766)

**A**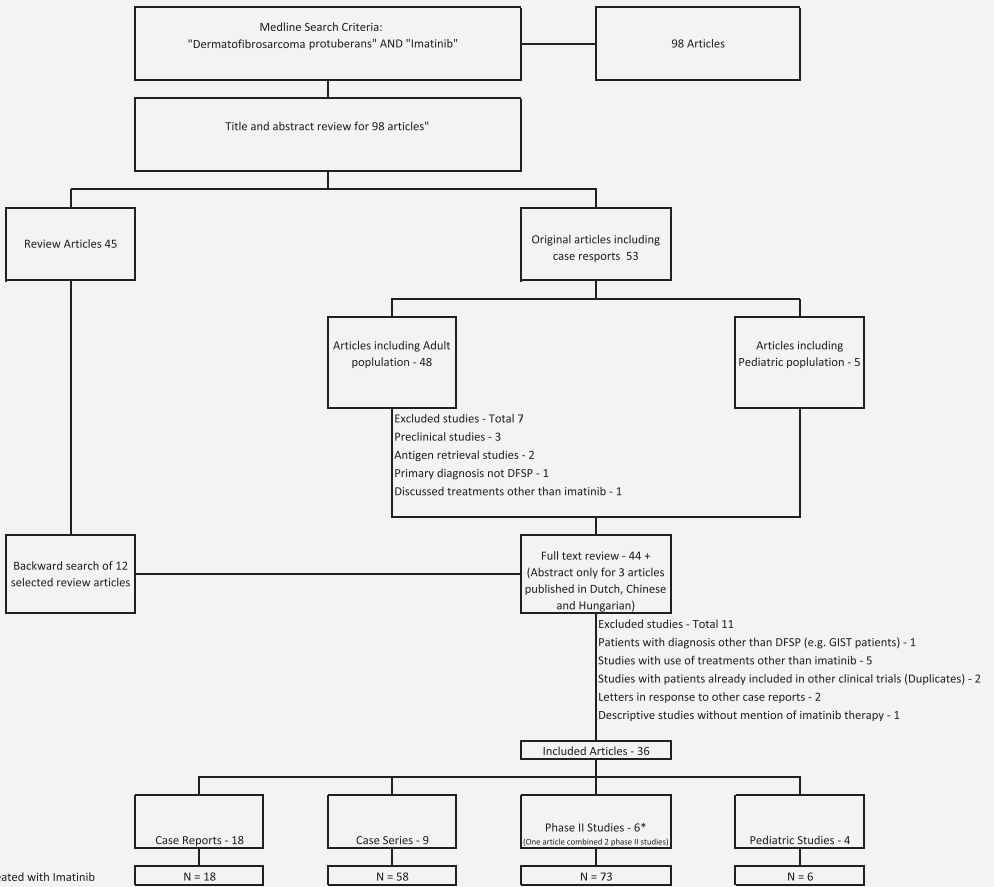**B**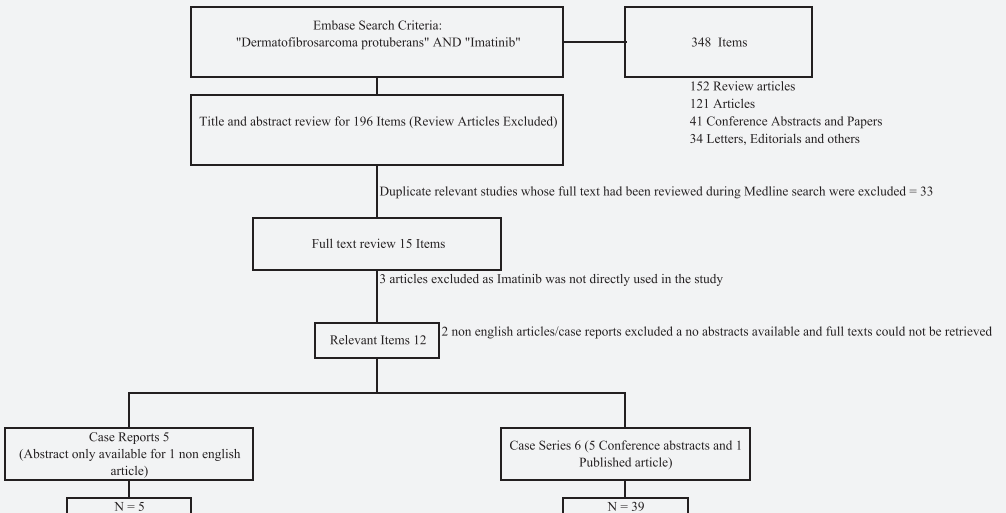

Supplement: MOESM11 [file 9676766]
